# Supplementary material for: Evaluation of an Audio-haptic Sensory Substitution Device for Enhancing Spatial Awareness for the Visually Impaired
Source: PubMed Central journal article supplement — Optom Vis Sci. 2018 Aug 27;95(9):757–65. doi: 10.1097/OPX.0000000000001284 (PMC6133230; doi:10.1097/opx.0000000000001284), 2018-08-27
Supplement: opx-95-757-s001.pdf [file opx-95-757-s001.pdf]

**Appendix Table A1.** Complete Results of the User Feedback Questionnaire per Participant.

| No. | Item                                                                                              | Participant |    |    |    |    |    |
|-----|---------------------------------------------------------------------------------------------------|-------------|----|----|----|----|----|
|     |                                                                                                   | P1          | P2 | P3 | P4 | P5 | P6 |
|     |                                                                                                   | Response    |    |    |    |    |    |
| 1   | <i>I think that I would like to use this device frequently.</i>                                   | 1           | 4  | 4  | 4  | 2  | 4  |
| 2   | <i>I found the device unnecessarily complicated.</i>                                              | 2           | 3  | 2  | 2  | 3  | 1  |
| 3   | <i>I thought the device was easy to use (set up and operate).</i>                                 | 1           | 2  | 2  | 3  | 2  | 4  |
| 4   | <i>I think that I would need the support of a technical person to be able to use this device.</i> | 5           | 5  | 4  | 4  | 3  | 1  |
| 5   | <i>I found the various functions in this device were well integrated.</i>                         | 4           | 3  | 4  | 4  | 4  | 5  |
| 6   | <i>I thought there was too much inconsistency in this device.</i>                                 | 4           | 3  | 2  | 2  | 3  | 2  |
| 7   | <i>I would imagine that most people would learn to use this device very quickly.</i>              | 4           | 2  | 3  | 4  | 4  | 3  |
| 8   | <i>I found the device very cumbersome to use.</i>                                                 | 2           | 3  | 2  | 2  | 2  | 1  |
| 9   | <i>I felt very confident using the device.</i>                                                    | 4           | 4  | 4  | 4  | 3  | 4  |
| 10  | <i>I needed to learn a lot of things before I could get going with this device.</i>               | 1           | 3  | 4  | 4  | 2  | 4  |
| 11  | <i>I think that using this device would enhance my capacity for leisure activities.</i>           | 1           | 3  | 4  | 4  | 2  | 5  |

After study completion all participants answered a user feedback questionnaire. The questionnaire items and the responses of the six participants (P1-P6) are shown in the table. The Likert Scale response options were: *I strongly disagree* (1), *I disagree* (2), *I am undecided* (3), *I agree* (4), and *I strongly agree* (5).
