# Supplementary figures and images for: Evaluation of an Audio-haptic Sensory Substitution Device for Enhancing Spatial Awareness for the Visually Impaired
Source: PubMed Central journal article supplement — Optom Vis Sci. 2018 Aug 27;95(9):757–65. doi: 10.1097/OPX.0000000000001284 (PMC6133230; doi:10.1097/opx.0000000000001284), 2018-08-27

Appendix Figure A1

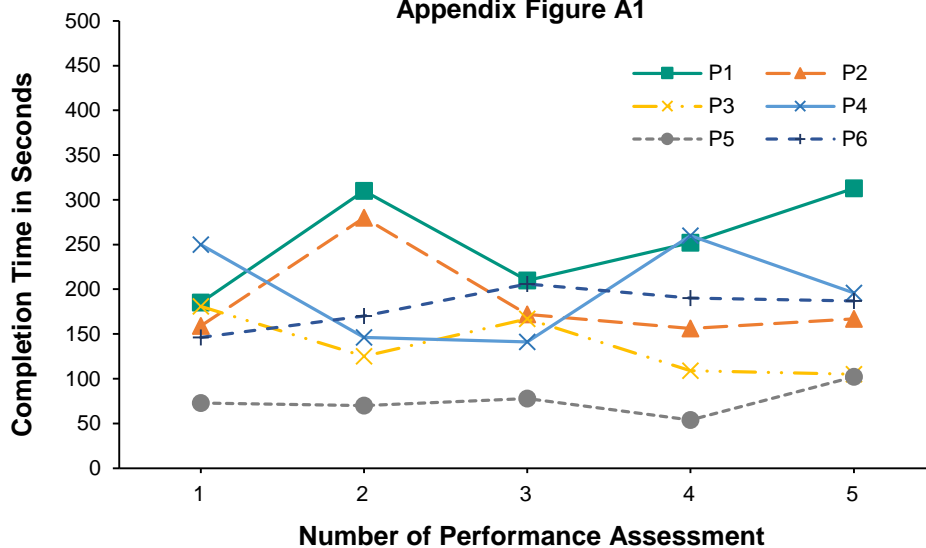

Appendix Figure A2

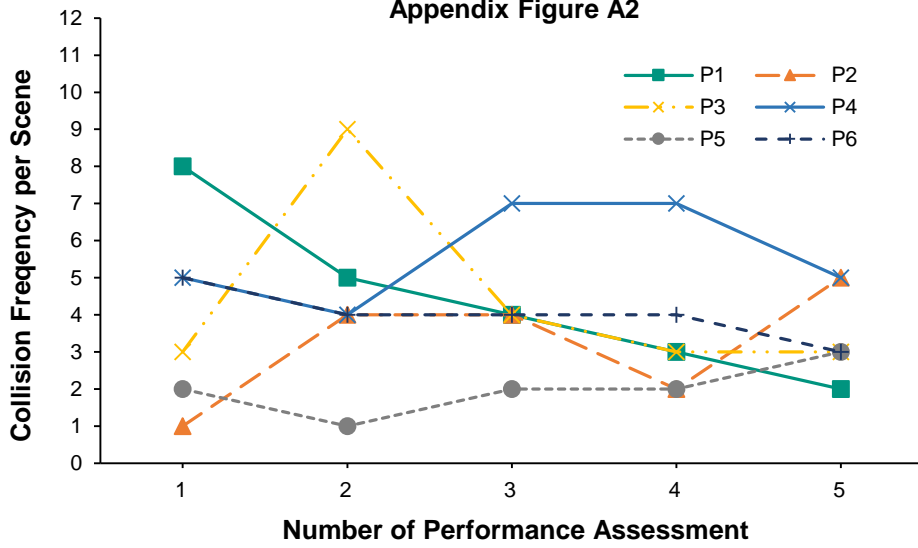

Supplement: opx-95-757-s002.pdf [file opx-95-757-s002.pdf]
